# Supplementary material
Source: PubMed Central journal article supplement (PMC4944824)
Supplement: NIHMS796718-supplement-1.pdf [file NIHMS796718-supplement-1.pdf]

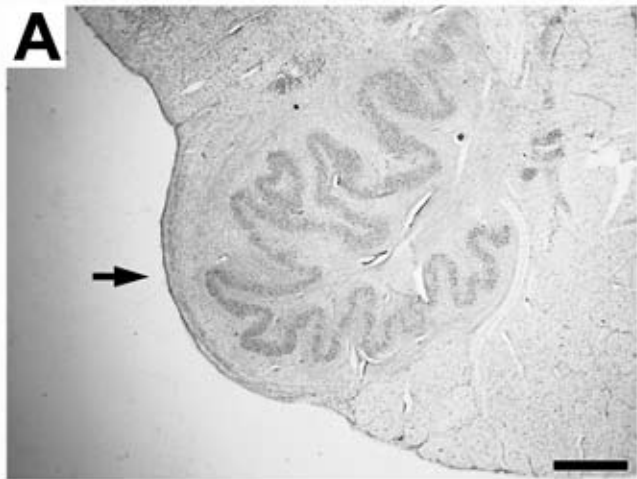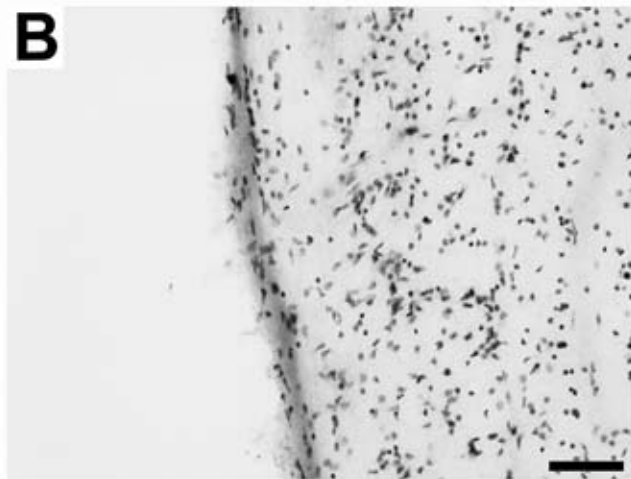

Supplemental eFigure 1: **Safety**. (A-B) No Schwann cell hyperplasia occurs 3 years after AAV2-NGF gene delivery. (A) Nissl stain shows normal gross appearance of lower medulla. Arrow indicates region of magnified view in (B), where normal pial cell layer is evident without evidence of Schwann cell migration and hyperplasia, indicating no leakage of NGF into cerebrospinal fluid 10. Scale bar A 1500 $\mu$ m; B 100 $\mu$ m.
